# Supplementary material for: The relationship between vitamin K and T2DM: a systematic review and meta-analysis
Source: Royal Society of Chemistry journal article supplement (doi:10.1039/d3fo02943c), 2023-01-01
Supplement: d3fo02943c1.pdf [file d3fo02943c1.pdf]

## Figure legends

**Table S1** Search strategy

**Table S2** Publication bias (Egger test) performed for included RCTs.

**Fig.S1** Sensitivity analysis results of FBS in subjects supplemented with vitamin K or placebo.

**Fig.S2** Sensitivity analysis results of FINS in subjects supplemented with vitamin K or placebo.

**Fig.S3** Sensitivity analysis results of HOMA-IR in subjects supplemented with vitamin K or placebo.

**Fig.S4** Sensitivity analysis of vitamin K and the risk of developing T2DM.

**Fig.S5** Funnel plot of the associations between vitamin K and T2DM. Abbreviations: s.e.:standard error; logor: the logarithm of HR

**Table S1** Search strategy

| criteria      | Descriptions and search terms used for each criteria                                                                                                                                                                                                                                                                                                                                                                                                                                                                                                         |
|---------------|--------------------------------------------------------------------------------------------------------------------------------------------------------------------------------------------------------------------------------------------------------------------------------------------------------------------------------------------------------------------------------------------------------------------------------------------------------------------------------------------------------------------------------------------------------------|
| Vitamin K     | Vitamin K OR Vitamin K1 OR Vitamin K2 OR Vitamin K3 OR<br>naphthoquinone OR phyloquinone OR konakion OR phytonadion OR<br>menadion OR menaquinone OR menaquinones OR phytomenadion OR<br>mephyton                                                                                                                                                                                                                                                                                                                                                            |
| Blood glucose | Diabetes Mellitus OR Hyperglycemia OR Insulin Resistance OR Metabolic<br>Syndrome OR Glucose Intolerance OR Prediabetic State OR HOMA-IR OR<br>$\beta$ -cell function OR insulin secretion OR impaired glucose tolerance OR<br>impaired fasting glucose OR glycemic control OR insulin OR glucose OR<br>diabetic OR HbA1c OR diabetes OR type 2 diabetes OR glycohemoglobin<br>OR T2DM OR type 2 diabetes mellitus OR fasting plasma glucose OR<br>fasting plasma insulin OR adiponectin OR oral glucose tolerance OR<br>hyperinsulinaemic euglycaemic clamp |

**Table S2** Publication bias (Egger test) performed for included RCTs.

|              | t     | P     |
|--------------|-------|-------|
| FBS (mg/dl)  | -0.09 | 0.932 |
| FINS(μIU/ml) | -1.87 | 0.111 |
| HOMA-IR      | -1.48 | 0.190 |

FBS, fasting plasma glucose; FINS, fasting plasma Insulin; HOMA-IR, Homeostatic Model Assessment of Insulin Resistance; TC, total cholesterol; TG, triglycerides; LDL-C, low density lipoprotein cholesterol; HDL-C, high density lipoprotein cholesterol.

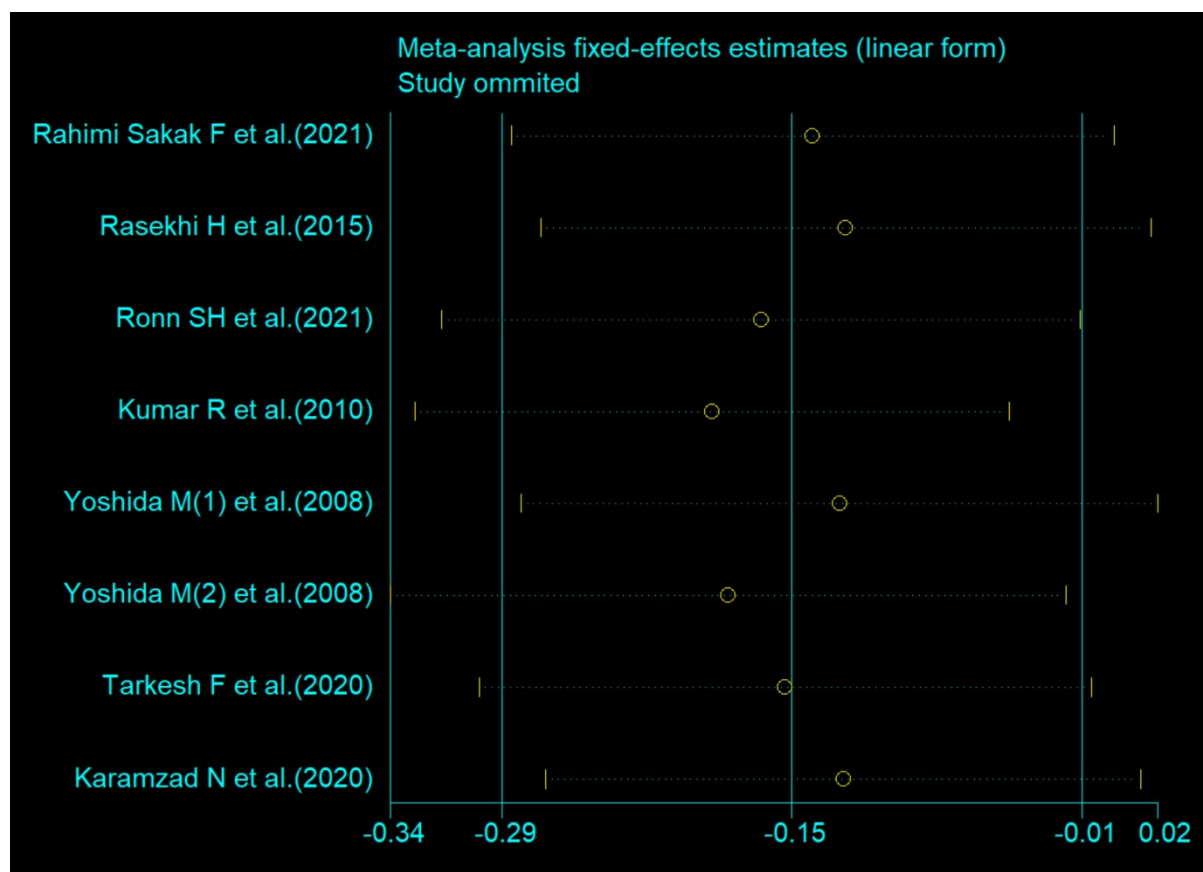

**Fig.S1** Sensitivity analysis results of FBS in subjects supplemented with vitamin K or placebo.

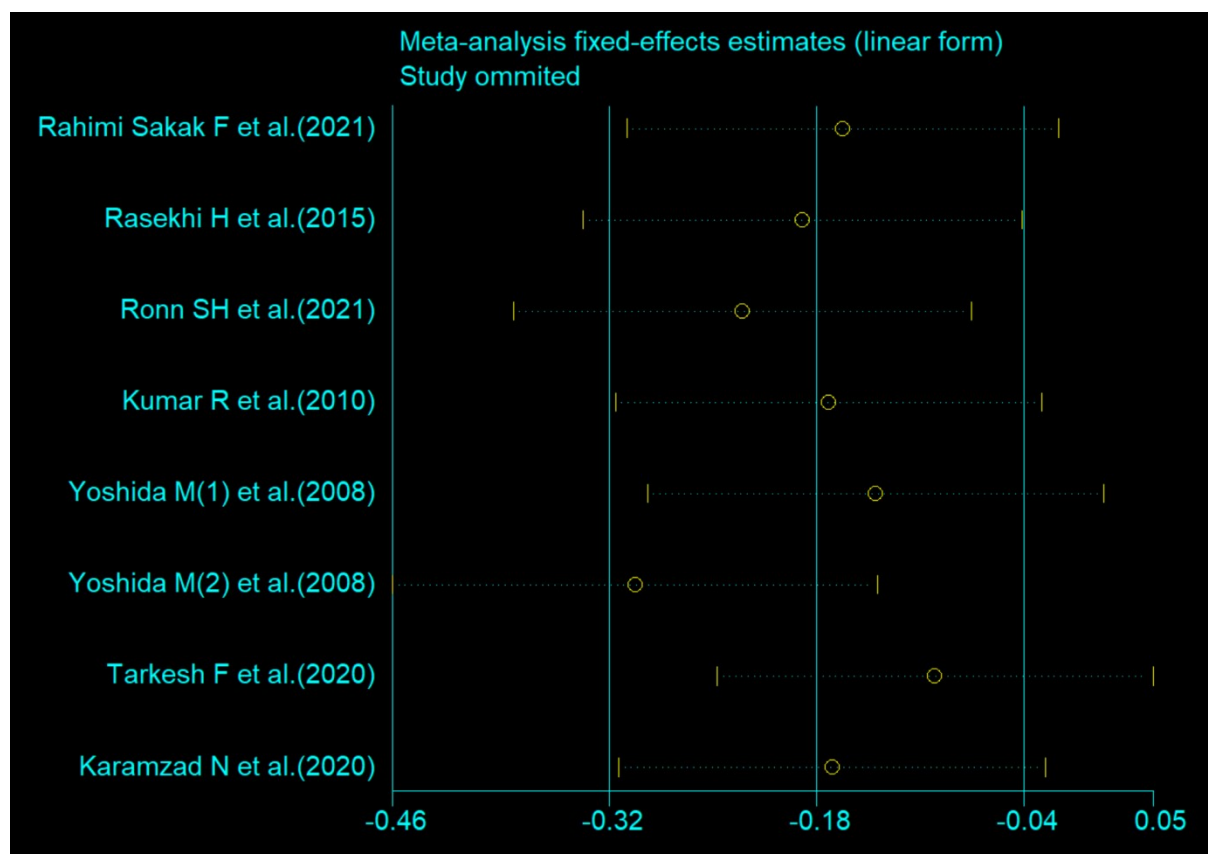

**Fig.S2** Sensitivity analysis results of FINS in subjects supplemented with vitamin K or placebo.

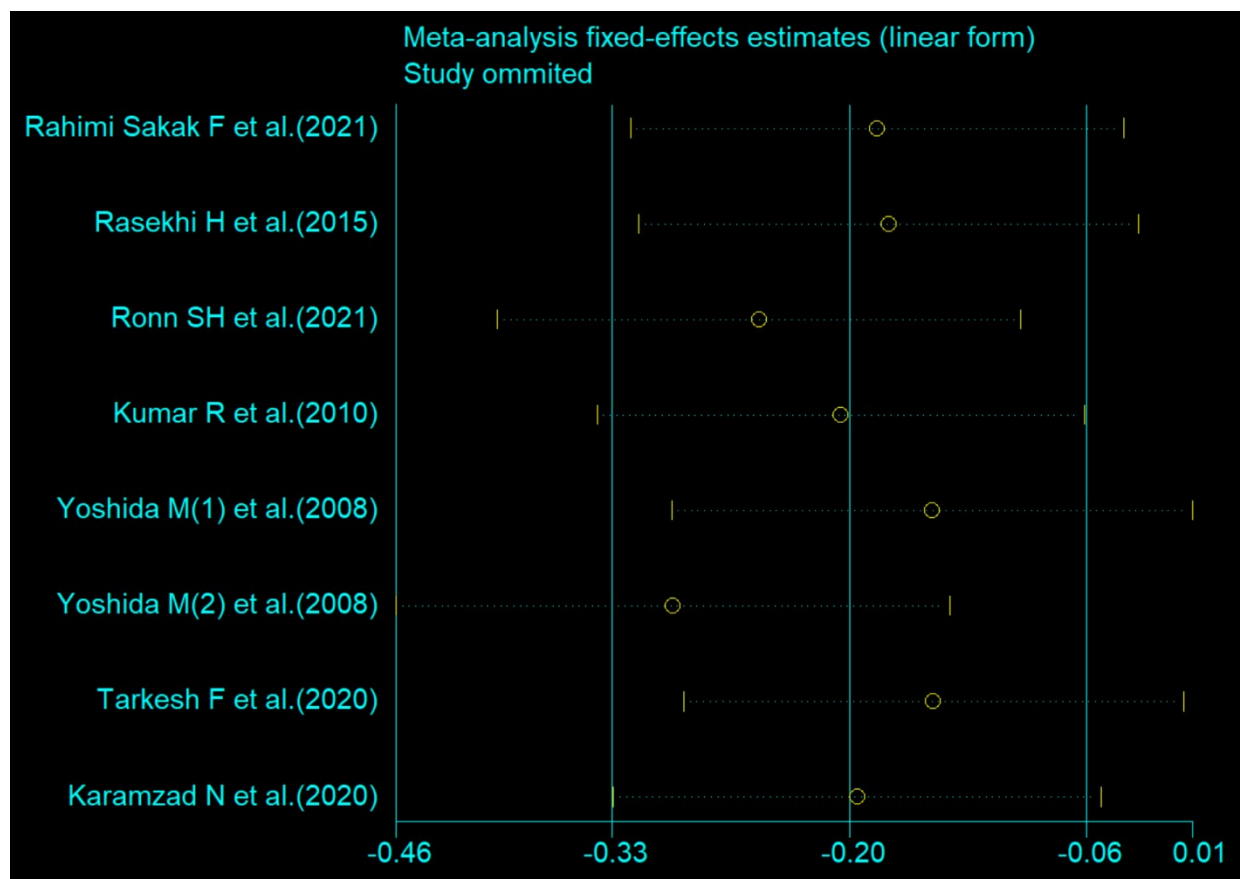

**Fig.S3** Sensitivity analysis results of HOMA-IR in subjects supplemented with vitamin K or placebo.

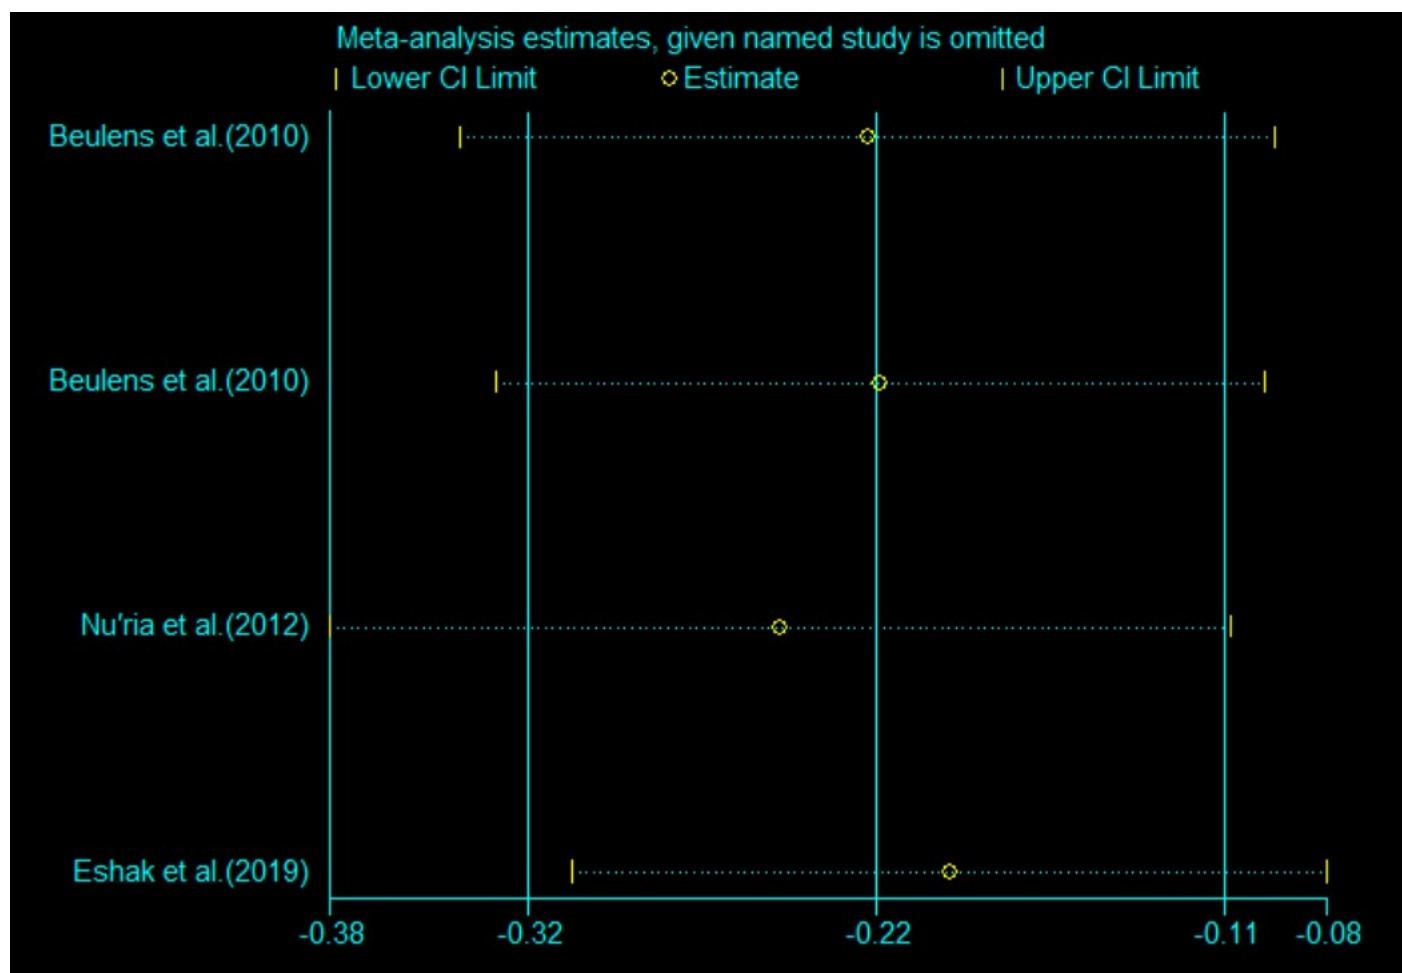

**Fig.S4** Sensitivity analysis of vitamin K and the risk of developing T2DM.

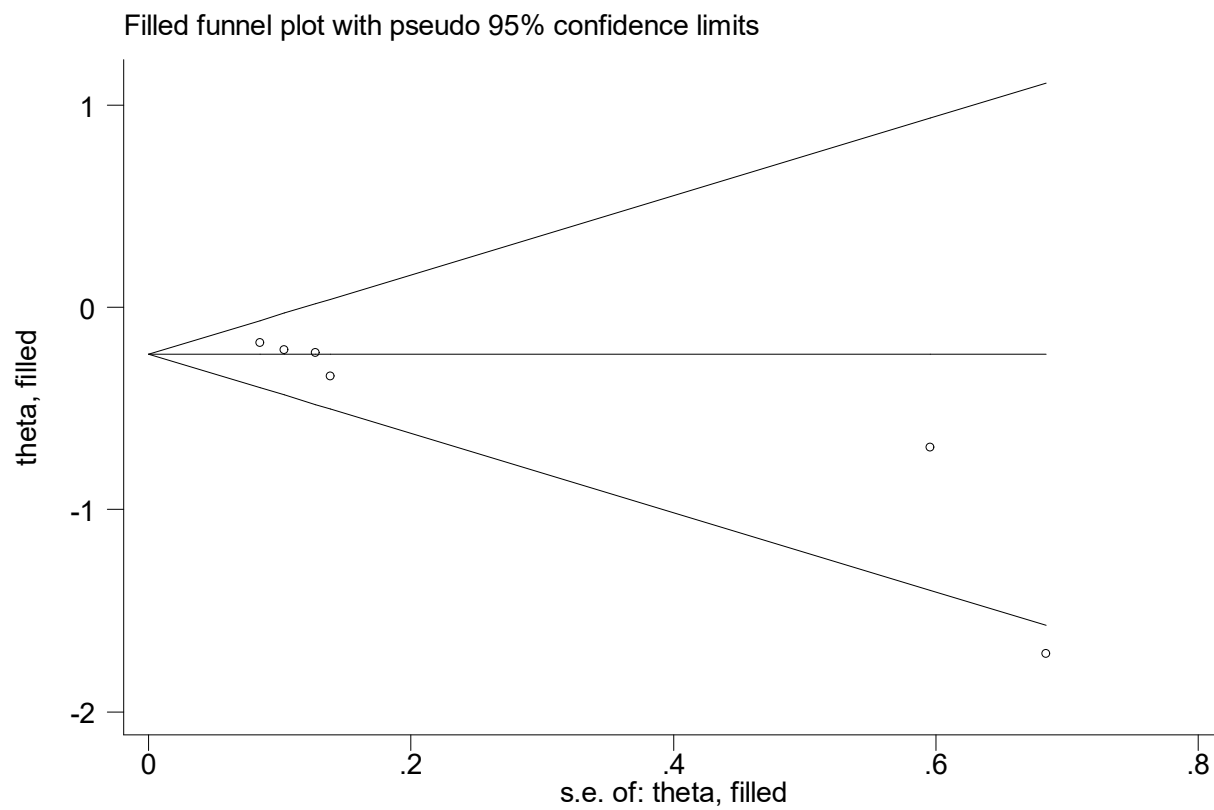

**Fig.S5** Funnel plot of the associations between vitamin K and T2DM. Abbreviations: s.e.:standard error; logor: the logarithm of HR
